## ■ C O R R E C T I O N

# The UKPDS risk engine: a model for the risk of coronary heart disease in Type II diabetes (UKPDS 56)

**Richard J. STEVENS, Viti KOTHARI, Amanda I. ADLER, Irene M. STRATTON and Rury R. HOLMAN on behalf of the United Kingdom Prospective Diabetes Study (UKPDS) Group**

Volume 101 (2001), pp. 671–679

The Publisher regrets that the following errors appeared in the above published paper:

Page 673, right column, line 11: for ‘where  $d$  is the duration of diagnosed diabetes’ *read* ‘where  $d$  is the effect parameter for the duration of diagnosed diabetes’.

Page 673, right column, line 18: for ‘The survival probability for  $t$  years in a patient who has had diabetes for  $T$  years is also useful’ *read* ‘The risk over  $t$  years in a patient who has had diabetes for  $T$  years is also useful’.

Page 673, right column, line 23: for  $(t-1, t)$  *read*  $(t-1, t]$ .

Page 675, Figure 2 legend: for ‘(a) HbA<sub>1c</sub> value’ *read* ‘(a) By HbA<sub>1c</sub> value’, for ‘(b) Systolic blood pressure’ *read* ‘(b) By systolic blood pressure’, and for ‘(c) Lipid ratio’ *read* ‘(c) By lipid ratio’.

Page 675, left column, lines 6 and 8: for 0.112 *read* 0.0112.

Page 675, left column, line 12: for 0.0883 *read* 0.00883.

Page 675, right column, line 33: for 4541 *read* 4540.

Page 677, right column, line 27: for 1.22 *read* 1.23.

Page 677, right column, line 31: for  $3.845^{1.22} = 5.171$  *read*  $3.845^{1.23} = 5.24$ .

Page 678, left column, line 20: for ‘ $P(t) = 0.049$  when  $qd^{t-1}$ ’ *read* ‘ $P(t) = 0.049$  when  $qd^{t-1} = 0.05$ ’.

Page 678, right column, reference 8: for ‘Scandinavian Simvastatin (4S)’ *read* ‘Scandinavian Simvastatin Survival Study (4S)’.

Page 679, left column, reference 28: for <http://hyp.ac.uk/bhs/managmt.html>

*read* <http://www.hyp.ac.uk/bhs/managemt.html>
